# Supplementary material
Source: ML conference proceedings conference paper supplement (https://openaccess.thecvf.com/content/CVPR2026/html/Wang_D3D-VLP_Dynamic_3D_CVPR_2026_paper.html)
Supplement: Supplementary file 1 [file 35297_supp.pdf › 35297_supp/35297_supp.pdf]

## A. Details of 3D CoT Dataset

**Grounding Annotations.** We collect large-scale 3D instance-text pairs (Figure 1) primarily from SceneVerse [8], MMScan [13], PQ3D [26], and Grounded 3D-LLM [3], as illustrated in Listing 3.

**Navigation Annotations.** We adapt instruction-following navigation data from R2R-CE [11], REVERIE-CE [15, 21], SRDF [20], and NavRAG [22] for the Habitat simulator environment [14, 17].

**Grounding-Navigation Annotations.** For open-vocabulary object grounding and navigation, we leverage instance-text annotations from HM3D [16, 23] and MP3D [2] that support the Habitat simulator [14, 17]. We further integrate synthetic data from HSSD [9], ProcTHOR-10K [5, 9], and ProcTHOR-Objaverse (AI2-THOR) [6, 10]. To generate trajectories for these instances:

- **Habitat Simulator:** For HM3D, MP3D, HSSD, and ProcTHOR-10K (Habitat), the simulator computes optimal trajectories based on the scene mesh, ensuring collision-free paths with minimal distance.
- **AI2-THOR Simulator:** For ProcTHOR-Objaverse (AI2-THOR), as the native simulator [10] lacks a sufficient ground-truth path computation function for our needs, we implemented an A\* algorithm based on traversable BEV maps to generate shortest paths while avoiding obstacles.

**Planning-Grounding-Navigation Annotations.** These comprehensive samples are primarily sourced from SG3D [25] and Grounded 3D-LLM [3]. As shown in Listing 1, these annotations contain hierarchical instructions with multiple sub-goals. Each sub-goal specifies the target object category, its index in the instance point cloud (Figure 1), and the center coordinates for the instance.

**Planning-Grounding Annotations.** Scenes with planning annotations that are currently incompatible with the Habitat simulator, specifically ScanNet [4], 3RScan [18], and ARKitScenes [1], are utilized for planning and grounding tasks. While these samples lack navigational trajectories, they provide rich instance-level grounding and planning instructions.

**Planning-Navigation Annotations.** We incorporate data from VLN-Trans [24] (see Listing 2). In these samples, the sub-goal coordinates correspond to trajectory waypoints rather than specific object instances, focusing on path planning and navigation without explicit object grounding.

**3D Scene Composition.** The annotations described above span a wide range of environments, including posed RGB-D videos from real-world datasets (ScanNet [4], 3RScan [18], ARKitScenes [1]), high-quality real scans (HM3D [16], MP3D [2]), and synthetic scenes (HSSD [9], ProcTHOR-10K [5], ProcTHOR-Objaverse [7]).

**Grounding Label Assignment.** Unlike traditional 3D grounding tasks where all candidate objects are visible, the target object may be unobserved (i.e., lacking cor-

responding 3D tokens) during our online training. In such cases, the grounding output is assigned to a special `<grounding_none>` token. When tokens corresponding to the target instance exist within the patch or instance tokens, we optimize the model using a multi-label cross-entropy loss, treating the target tokens as positive samples and the rest as negative. Following g3D-LF [19] and Dynam3D [21], a 3D token is assigned to an instance based on its nearest neighbor in the ground-truth instance point cloud (available in HM3D, MP3D, ScanNet, 3RScan, and ARKitScenes). For scenes lacking instance point cloud annotations (e.g., HSSD, ProcTHOR-10K, and ProcTHOR-Objaverse), we only consider patch tokens within a 0.2m radius of the target instance center as positive samples.

## B. Details of Real-world Mobile Manipulation

We validate the effectiveness of our D3D-VLP in real-world scenarios using the Hello Robot Stretch 3 mobile manipulator. The robot is equipped with a head-mounted Intel RealSense D435i RGB-D camera, which captures streaming posed RGB-D images. These streams are processed in real-time by the Dynam3D Encoder [21] to incrementally construct and update the Multi-level 3D Memory, ensuring the agent maintains a persistent and structured 3D scene representation during exploration.

For inference, we deploy the model on a remote workstation equipped with an NVIDIA RTX 4090 GPU and 64GB of RAM. The workstation handles the computationally intensive 3D-VLM reasoning and Dynamic 3D CoT generation, communicating with the robot via a local area network (LAN) over WiFi. Our deployment framework is adapted from DynaMem [12], which we extended to support our waypoint-based action space and local obstacle avoidance. The experiments are conducted in a physical home-like environment comprising a living room, kitchen, meeting room, and office. Crucially, to strictly evaluate zero-shot generalization, none of the objects or scene layouts in this environment are included in the training dataset.

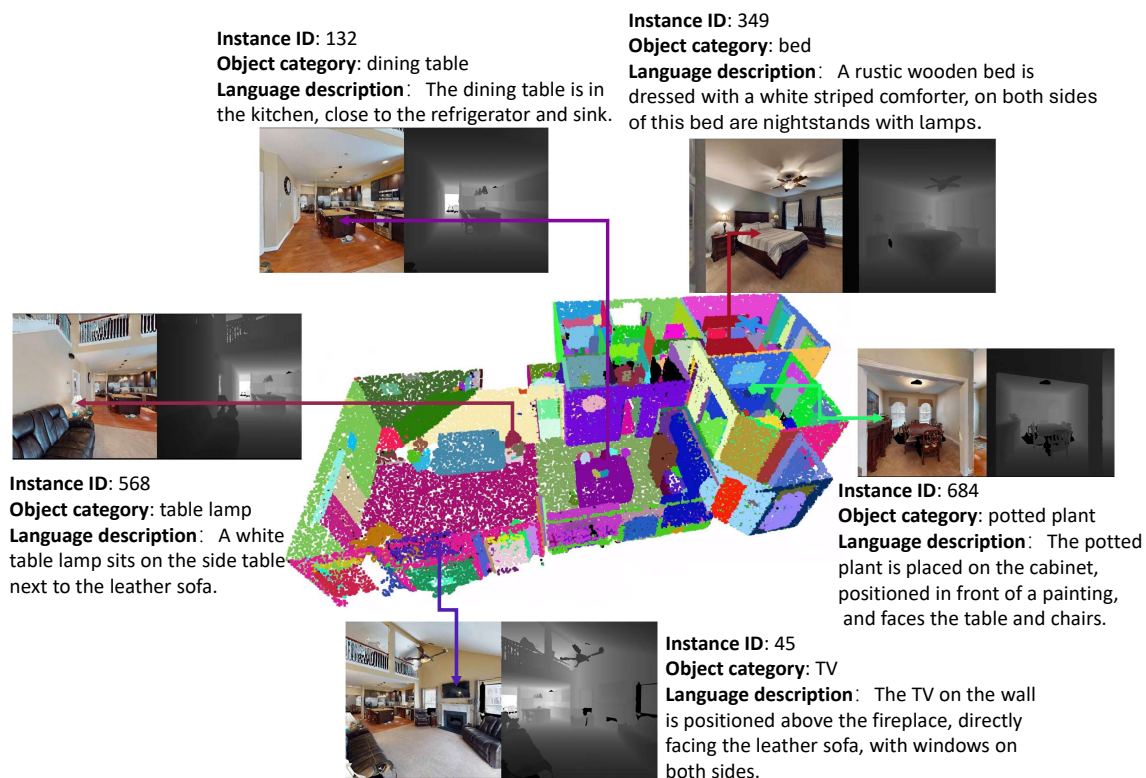

Figure 1. Demonstration of a 3D scene in the training data [8, 19]. Instance-level point clouds mark all instances with object categories and language descriptions.

**Listing 1. Planning-Grounding-Navigation Annotation.** An example showing the unified data structure and the corresponding prompt format.

```

1 // 1. JSON Annotation
2 {
3   "scene_id": "hm3d/00378-DqJKU7YU7dA",
4   "instruction": "Prepare for a shower.",
5   "planning": [
6     "1. Go to the shower containing a washcloth.",
7     "2. Turn on the water to adjust the temperature.",
8     "3. Take a towel from the rack stand to the left of the sink.",
9     "4. Hang the towel on the shower curtain rod right by the shower."
10  ],
11  "instance_id": [[797], [797], [230], [515]],
12  "instance_type": ["shower", "shower", "towel", "shower curtain rod"],
13  // Coordinates truncated for display
14  "instance_position": [
15    [-6.554, -28.336, 0.863],
16    [-6.554, -28.336, 0.863],
17    [-2.407, -14.418, 1.189],
18    [-3.649, -20.311, 0.981]
19  ]
20 }
21
22 // 2. Input Prompt Trace
23 <|im_start|>system\n You are a helpful assistant<|im_end|>\n
24 <|im_start|>user\n
25 <patch tokens>\n <instance tokens>\n <zone tokens>\n
26 The instruction: Prepare for a shower.\n
27 The history plans: 1. Go to the shower containing a washcloth.<shower_1>\n
28 The previous waypoints:<waypoint_4>,<waypoint_7>,<waypoint_9>,<waypoint_15>\n
29 The candidate waypoints: <waypoint_17><waypoint_18><waypoint_19>\n
30 Please give deep thinking plans. <|im_end|>\n<|im_start|>assistant\n
31 // 3. Output Trace
32 The next plans: 2. Turn on the water to adjust the temperature.\n
33 3. Take a towel from the rack stand to the left of the sink.\n
34 4. Hang the towel on the shower curtain rod right by the shower.\n
35 The grounded:target<shower_1>\n
36 The navigation action:waypoint<waypoint_19>reached the subgoal\n
37 <|im_end|>

```

Listing 2. **Planning-Navigation Annotation.** An example for vision-and-language navigation task with detailed step descriptions.

```
1 {
2   "scene_id": "mp3d/PX4nDJXEHrG",
3   "instruction": "Walk across patio into the house. Walk forward toward wall with stone tile. Walk past stone tile
4     wall on left side. Walk past stair case. Stop at entrance to kitchen area.",
5   "planning": [
6     "1. Walk across patio into the house.",
7     "2. Walk forward toward wall with stone tile.",
8     "3. Walk past stone tile wall on left side.",
9     "4. Walk past stair case.",
10    "5. Stop at entrance to kitchen area."
11  ],
12  "habitat_start_position": [-11.546, 0.115, 4.632],
13  "habitat_start_rotation": [0, 0.998, 0, -0.049],
14  "instance_id": [[-10000], [-10000], [-10000], [-10000], [-10000]],
15  "instance_type": [null, null, null, null, null],
16  "instance_position": [
17    [-11.559, -3.040, 0.115],
18    [-11.066, -1.661, 0.115],
19    [-12.035, 1.826, 0.115],
20    [-13.690, 4.130, 0.115],
21    [-13.619, 5.133, 0.115]
22  ]
23 }
```

Listing 3. **Grounding-Navigation Annotation.** An example for open-vocabulary object grounding and navigation task without explicit intermediate planning steps.

```
1 {
2   "scene_id": "hm3d/iigzGlrtnx",
3   "instruction": "Please find the printer. The printer is next to the paper tray and is placed on desk.",
4   "planning": "",
5   "instance_id": [[96]],
6   "instance_type": ["printer"],
7   "instance_position": [
8     [6.704, 1.147, 2.792]
9   ]
10 }
11 }
```

## References

- [1] Gilad Baruch, Zhuoyuan Chen, Afshin Dehghan, Yuri Feigin, Peter Fu, Thomas Gebauer, Daniel Kurz, Tal Dimry, Brandon Joffe, Arik Schwartz, et al. Arkitscenes: A diverse real-world dataset for 3d indoor scene understanding using mobile rgb-d data. In *Thirty-fifth Conference on Neural Information Processing Systems Datasets and Benchmarks Track (Round 1)*. 1
- [2] Angel Chang, Angela Dai, Thomas Funkhouser, Maciej Halber, Matthias Nießner, Manolis Savva, Shuran Song, Andy Zeng, and Yinda Zhang. Matterport3d: Learning from rgb-d data in indoor environments. In *International Conference on 3D Vision (3DV)*, 2017. 1
- [3] Yilun Chen, Shuai Yang, Haifeng Huang, Tai Wang, Ruiyuan Lyu, Runsen Xu, Dahua Lin, and Jiangmiao Pang. Grounded 3d-llm with referent tokens. *arXiv preprint arXiv:2405.10370*, 2024. 1
- [4] Angela Dai, Angel X Chang, Manolis Savva, Maciej Halber, Thomas Funkhouser, and Matthias Nießner. Scannet: Richly-annotated 3d reconstructions of indoor scenes. In *Proceedings of the IEEE conference on computer vision and pattern recognition*, pages 5828–5839, 2017. 1
- [5] Matt Deitke, Eli VanderBilt, Alvaro Herrasti, Luca Weihs, Jordi Salvador, Kiana Ehsani, Winson Han, Eric Kolve, Ali Farhadi, Aniruddha Kembhavi, and Roozbeh Mottaghi. ProcTHOR: Large-Scale Embodied AI Using Procedural Generation. In *NeurIPS*, 2022. Outstanding Paper Award. 1
- [6] Kiana Ehsani, Tanmay Gupta, Rose Hendrix, Jordi Salvador, Luca Weihs, Kuo-Hao Zeng, Kunal Pratap Singh, Yejin Kim, Winson Han, Alvaro Herrasti, et al. Spoc: Imitating shortest paths in simulation enables effective navigation and manipulation in the real world. In *Proceedings of the IEEE/CVF Conference on Computer Vision and Pattern Recognition*, pages 16238–16250, 2024. 1
- [7] Kiana Ehsani, Tanmay Gupta, Rose Hendrix, Jordi Salvador, Luca Weihs, Kuo-Hao Zeng, Kunal Pratap Singh, Yejin Kim, Winson Han, Alvaro Herrasti, et al. Spoc: Imitating shortest paths in simulation enables effective navigation and manipulation in the real world. In *CVPR*, pages 16238–16250, 2024. 1
- [8] Baoxiong Jia, Yixin Chen, Huangyue Yu, Yan Wang, Xuesong Niu, Tengyu Liu, Qing Li, and Siyuan Huang. Sceneverse: Scaling 3d vision-language learning for grounded scene understanding. In *European Conference on Computer Vision (ECCV)*, 2024. 1, 2
- [9] Mukul Khanna, Yongsan Mao, Hanxiao Jiang, Sanjay Haresh, Brennan Shacklett, Dhruv Batra, Alexander Clegg, Eric Undersander, Angel X Chang, and Manolis Savva. Habitat synthetic scenes dataset (hssd-200): An analysis of 3d scene scale and realism tradeoffs for objectgoal navigation. In *Proceedings of the IEEE/CVF Conference on Computer Vision and Pattern Recognition*, pages 16384–16393, 2024. 1
- [10] Eric Kolve, Roozbeh Mottaghi, Winson Han, Eli VanderBilt, Luca Weihs, Alvaro Herrasti, Matt Deitke, Kiana Ehsani, Daniel Gordon, Yuke Zhu, et al. Ai2-thor: An interactive 3d environment for visual ai. *arXiv preprint arXiv:1712.05474*, 2017. 1
- [11] Jacob Krantz, Erik Wijmans, Arjun Majumdar, Dhruv Batra, and Stefan Lee. Beyond the nav-graph: Vision-and-language navigation in continuous environments. In *Computer Vision—ECCV 2020: 16th European Conference, Glasgow, UK, August 23–28, 2020, Proceedings, Part XXVIII 16*, pages 104–120. Springer, 2020. 1
- [12] Peiqi Liu, Zhanqiu Guo, Mohit Warke, Soumith Chintala, Chris Paxton, Nur Muhammad Mahi Shafiullah, and Lerrel Pinto. Dynamem: Online dynamic spatio-semantic memory for open world mobile manipulation. In *CoRL 2024 Workshop on Mastering Robot Manipulation in a World of Abundant Data*. 1
- [13] Ruiyuan Lyu, Tai Wang, Jingli Lin, Shuai Yang, Xiaohan Mao, Yilun Chen, Runsen Xu, Haifeng Huang, Chenming Zhu, Dahua Lin, and Jiangmiao Pang. Mmscan: A multi-modal 3d scene dataset with hierarchical grounded language annotations. In *arXiv*, 2024. 1
- [14] Xavi Puig, Eric Undersander, Andrew Szot, Mikael Dallaire Cote, Ruslan Partsey, Jimmy Yang, Ruta Desai, Alexander William Clegg, Michal Hlavac, Tiffany Min, Theo Gervet, Vladimír Vondruš, Vincent-Pierre Berges, John Turner, Oleksandr Maksymets, Zolt Kira, Mrinal Kalakrishnan, Jitendra Malik, Devendra Singh Chaplot, Unnat Jain, Dhruv Batra, Akshara Rai, and Roozbeh Mottaghi. Habitat 3.0: A co-habitat for humans, avatars and robots, 2023. 1
- [15] Yuankai Qi, Qi Wu, Peter Anderson, Xin Wang, William Yang Wang, Chunhua Shen, and Anton van den Hengel. Reverie: Remote embodied visual referring expression in real indoor environments. In *Proceedings of the IEEE/CVF Conference on Computer Vision and Pattern Recognition*, pages 9982–9991, 2020. 1
- [16] Santhosh Kumar Ramakrishnan, Aaron Gokaslan, Erik Wijmans, Oleksandr Maksymets, Alexander Clegg, John M Turner, Eric Undersander, Wojciech Galuba, Andrew Westbury, Angel X Chang, et al. Habitat-matterport 3d dataset (hm3d): 1000 large-scale 3d environments for embodied ai. In *Thirty-fifth Conference on Neural Information Processing Systems Datasets and Benchmarks Track (Round 2)*. 1
- [17] Manolis Savva, Abhishek Kadian, Oleksandr Maksymets, Yili Zhao, Erik Wijmans, Bhavana Jain, Julian Straub, Jia Liu, Vladlen Koltun, Jitendra Malik, et al. Habitat: A platform for embodied ai research. In *CVPR*, pages 9339–9347, 2019. 1
- [18] Johanna Wald, Armen Avetisyan, Nassir Navab, Federico Tombari, and Matthias Nießner. Rio: 3d object instance re-localization in changing indoor environments. In *ICCV*, 2019. 1
- [19] Zihan Wang and Gim Hee Lee. g3d-1f: Generalizable 3d-language feature fields for embodied tasks. *arXiv preprint arXiv:2411.17030*, 2024. 1, 2
- [20] Zun Wang, Jialu Li, Yicong Hong, Songze Li, Kunchang Li, Shoubin Yu, Yi Wang, Yu Qiao, Yali Wang, Mohit Bansal, et al. Bootstrapping language-guided navigation learning with self-refining data flywheel. In *The Thirteenth International Conference on Learning Representations*. 1

- [21] Zihan Wang, Seungjun Lee, and Gim Hee Lee. Dynam3d: Dynamic layered 3d tokens empower vlm for vision-and-language navigation. In *Advances in Neural Information Processing Systems*, 2025. [1](#)
- [22] Zihan Wang, Yaohui Zhu, Gim Hee Lee, and Yachun Fan. Navrag: Generating user demand instructions for embodied navigation through retrieval-augmented llm. *arXiv preprint arXiv:2502.11142*, 2025. [1](#)
- [23] Karmesh Yadav, Ram Ramrakhya, Santhosh Kumar Ramakrishnan, Theo Gervet, John Turner, Aaron Gokaslan, Noah Maestre, Angel Xuan Chang, Dhruv Batra, Manolis Savva, et al. Habitat-matterport 3d semantics dataset. In *Proceedings of the IEEE/CVF Conference on Computer Vision and Pattern Recognition*, pages 4927–4936, 2023. [1](#)
- [24] Yue Zhang and Parisa Kordjamshidi. Vln-trans: Translator for the vision and language navigation agent. In *Proceedings of the 61st Annual Meeting of the Association for Computational Linguistics (Volume 1: Long Papers)*, pages 13219–13233, 2023. [1](#)
- [25] Zhuofan Zhang, Ziyu Zhu, Junhao Li, Pengxiang Li, Tianxu Wang, Tengyu Liu, Xiaojian Ma, Yixin Chen, Baoxiong Jia, Siyuan Huang, and Qing Li. Task-oriented sequential grounding and navigation in 3d scenes. *arXiv preprint arXiv:2408.04034*, 2024. [1](#)
- [26] Ziyu Zhu, Zhuofan Zhang, Xiaojian Ma, Xuesong Niu, Yixin Chen, Baoxiong Jia, Zhidong Deng, Siyuan Huang, and Qing Li. Unifying 3d vision-language understanding via promptable queries. In *European Conference on Computer Vision*, pages 188–206. Springer, 2024. [1](#)
